# Supplementary material for: bop5 mutations reveal new roles for the IC138 phosphoprotein in the regulation of flagellar motility and asymmetric waveforms
Source: PubMed Central journal article supplement — Mol Biol Cell. 2011 Aug 15;22(16):2862–74. doi: 10.1091/mbc.E11-03-0270 (PMC3154882; doi:10.1091/mbc.e11-03-0270), 2011-08-15
Supplement: E11-03-0270_1.pdf [file E11-03-0270_1.pdf]

## **SUPPLEMENTAL MATERIALS**

**Movie S1.** Flagellar beat pattern of a wild-type cell. Playback speed is 15fps.

**Movie S2.** Flagellar beat pattern of a *bop5-3* mutant. Playback speed is 30fps.

**Movie S3.** Flagellar beat pattern of *pf9-3* mutant. Playback speed is 30fps

**Movie S4.** Phototaxis of wild-type and *bop5-3*.

**Table S1.** Statistical analysis of forward swimming velocities.

|                                     | <i>wild-type</i> | <i>pf9-3</i> | <i>bop5-1</i> | <i>bop5-3</i> | <i>bop5-4</i> | <i>bop5-6</i> | <i>bop5-3</i><br><i>::IC138</i><br><i>2D1</i> | <i>bop5-3</i><br><i>::IC138</i><br><i>2E1</i> |
|-------------------------------------|------------------|--------------|---------------|---------------|---------------|---------------|-----------------------------------------------|-----------------------------------------------|
| <i>wt</i>                           | NA               | <0.005       | <0.005        | <0.005        | <0.005        | <0.005        | <0.005                                        | <0.005                                        |
| <i>pf9-3</i>                        |                  | NA           | <0.005        | <0.005        | <0.005        | <0.005        | <0.005                                        | <0.005                                        |
| <i>bop5-1</i>                       |                  |              | NA            | <0.005        | <0.005        | <0.005        | <0.005                                        | <0.005                                        |
| <i>bop5-3</i>                       |                  |              |               | NA            | <0.005        | <0.005        | <0.005                                        | <0.005                                        |
| <i>bop5-4</i>                       |                  |              |               |               | NA            | <0.005        | <0.005                                        | <0.005                                        |
| <i>bop5-6</i>                       |                  |              |               |               |               | NA            | <0.005                                        | <0.005                                        |
| <i>Bop5-3</i><br><i>::IC138 2D1</i> |                  |              |               |               |               |               | NA                                            | <b>0.832</b>                                  |

The swimming velocities of all strains shown in Figure 4A were compared using F-tests and T-tests, and the P values are shown here. The samples were scored as significantly different at P values less than 0.005. Because of the large sample sizes (N=190 to 552), small but significant differences were noted between all strains with respect to swimming velocities. The IC138 rescued strains are significantly faster than the *bop5-3* mutant (and other *bop5* mutants), not significantly different from one another, and slightly but significantly slower than wild-type.

**Table S2.** Statistical analysis of *in vitro* microtubule sliding velocities

|               | <i>wild-type</i> | <i>ida2-6</i> | <i>bop5-1</i> | <i>bop5-3</i> | <i>bop5-4</i> | <i>bop5-6</i> | <i>bop5-3</i><br><i>::IC138</i><br><i>2D1</i> | <i>bop5-3</i><br><i>::IC138</i><br><i>2E1</i> |
|---------------|------------------|---------------|---------------|---------------|---------------|---------------|-----------------------------------------------|-----------------------------------------------|
| <i>wt</i>     | NA               | <0.005        | <0.005        | <0.005        | <0.005        | <0.005        | <b>0.007</b>                                  | <b>0.036</b>                                  |
| <i>ida2-6</i> |                  | NA            | <b>0.263</b>  | <b>0.581</b>  | <b>0.142</b>  | <b>0.600</b>  | <0.005                                        | <0.005                                        |
| <i>bop5-1</i> |                  |               | NA            | <b>0.513</b>  | <0.005        | <b>0.515</b>  | <0.005                                        | <0.005                                        |
| <i>bop5-3</i> |                  |               |               | NA            | <b>0.013</b>  | <b>0.991</b>  | <0.005                                        | <0.005                                        |
| <i>bop5-4</i> |                  |               |               |               | NA            | <b>0.012</b>  | <0.005                                        | <0.005                                        |
| <i>bop5-6</i> |                  |               |               |               |               | NA            | <0.005                                        | <0.005                                        |

The *in vitro* microtubule sliding velocities of all strains shown in Figure 4C were compared using T-tests and the P values are shown here. Samples were scored as significantly different at P values less than 0.005. All of the mutants are significantly slower than wild-type. The differences in sliding velocities between the mutant strains are not statistically significant, except for the difference between *bop5-4* and *bop5-1*. The sliding velocities of the IC138 rescued strains are significantly faster than *bop5-3*.

**Table S3.** Additional waveform parameters.

|                                                                | <b>Significantly influenced by flagellar length?</b> | <b>Wild-type</b> | <b><i>bop5-3</i></b> | <b><i>ida3</i></b> |
|----------------------------------------------------------------|------------------------------------------------------|------------------|----------------------|--------------------|
| Avg. propagation speed of R bend ( $\mu\text{m/s}$ )*          | Yes                                                  | 1449.7 +/- 240.2 | 1074.8 +/- 198.5     | 1140.2 +/- 111.0   |
| Avg. propagation speed of P bend ( $\mu\text{m/s}$ )           | Yes                                                  | 1411.7 +/- 191.8 | 1240.4 +/- 268.8     | 1506.0 +/- 191.6   |
| Avg. min. (R) curvature-physical ( $\text{rad}/\mu\text{m}$ )+ | Yes                                                  | -0.55 +/- 0.08   | -0.60 +/- 0.04       | -0.50 +/- 0.06     |
| Avg. max. (P) curvature-physical ( $\text{rad}/\mu\text{m}$ )+ | No                                                   | 0.20 +/- 0.04    | 0.18 +/- 0.03        | 0.22 +/- 0.03      |
| Initial delay between P and R bends (cyc)+                     | N/A                                                  | 0.44 +/- 0.02    | 0.40 +/- 0.07        | 0.32 +/- 0.04      |

Parameters where values for *bop5-3* and *ida3* were significantly different from wild-type are marked with an asterisk. Parameters where values for *bop5-3* and *ida3* were significantly different from each other are marked with a plus sign ( $p < 0.05$ ).
